# Supplementary material for: One-step synthesized PbSe nanocrystal inks decorated 2D MoS2 heterostructure for high stability photodetectors with photoresponse extending to near-infrared region
Source: Royal Society of Chemistry journal article supplement (doi:10.1039/d1tc05837a), 2022-01-01
Supplement: d1tc05837a1.pdf [file d1tc05837a1.pdf]

## **Supporting information:**

### **One-Step Synthesized PbSe Nanocrystal Inks Decorated 2D MoS<sub>2</sub> Heterostructure for High Stability Photodetectors with Photoresponse Extend to Near-Infrared Region**

Mingfa Peng,<sup>a</sup> Yi Tao,<sup>b</sup> Xuekun Hong,<sup>a</sup> Yushen Liu,<sup>b</sup> Zhen Wen\*<sup>b</sup> and Xuhui Sun\*<sup>b</sup>

<sup>a</sup> School of Electronic and Information Engineering, Jiangsu Province Key Laboratory of Advanced Functional Materials, Changshu Institute of Technology, Changshu, Jiangsu 215500, P. R. China

<sup>b</sup> Institute of Functional Nano & Soft Materials (FUNSOM), and Jiangsu Key Laboratory for Carbon-based Functional Materials and Devices, Soochow University, Suzhou, Jiangsu 215123, P. R. China.

\*Corresponding Author: Z. Wen: [wenzhen2011@suda.edu.cn](mailto:wenzhen2011@suda.edu.cn), X. Sun:

[xhsun@suda.edu.cn](mailto:xhsun@suda.edu.cn)

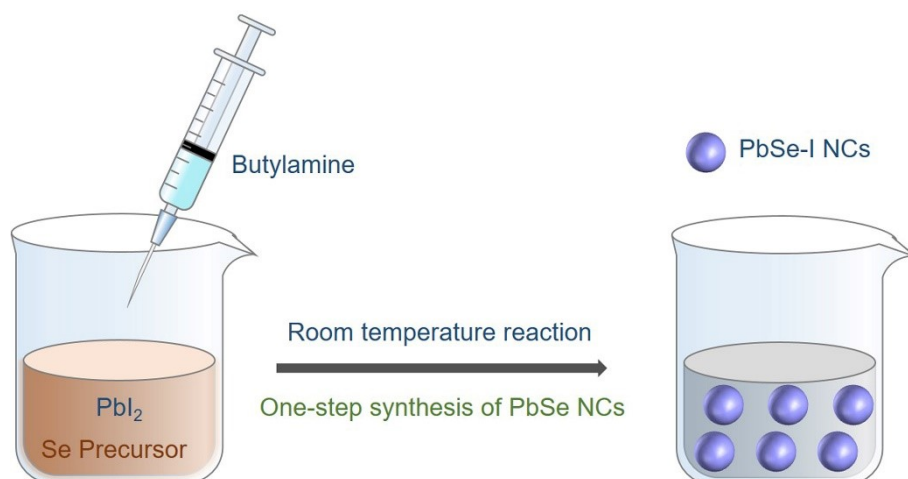

**Fig. S1** Schematic illustration of one-step synthesis of PbSe nanocrystal inks.

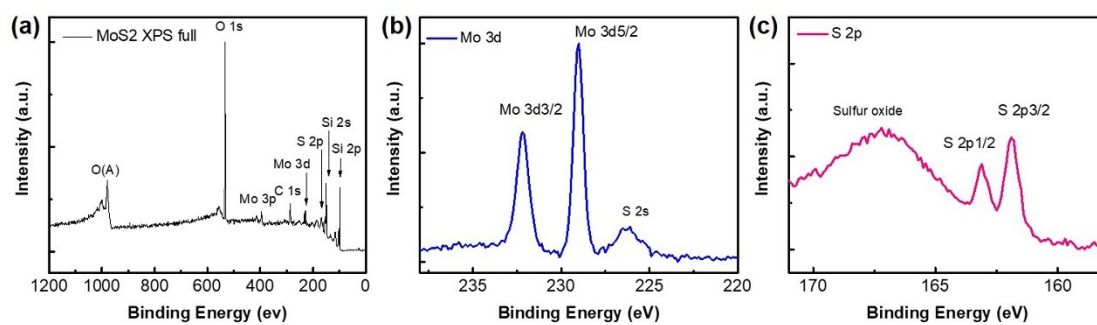

**Fig. S2** XPS spectra of (a) full spectra, (b) Mo 3d and (c) S 2p of 2D MoS<sub>2</sub>.

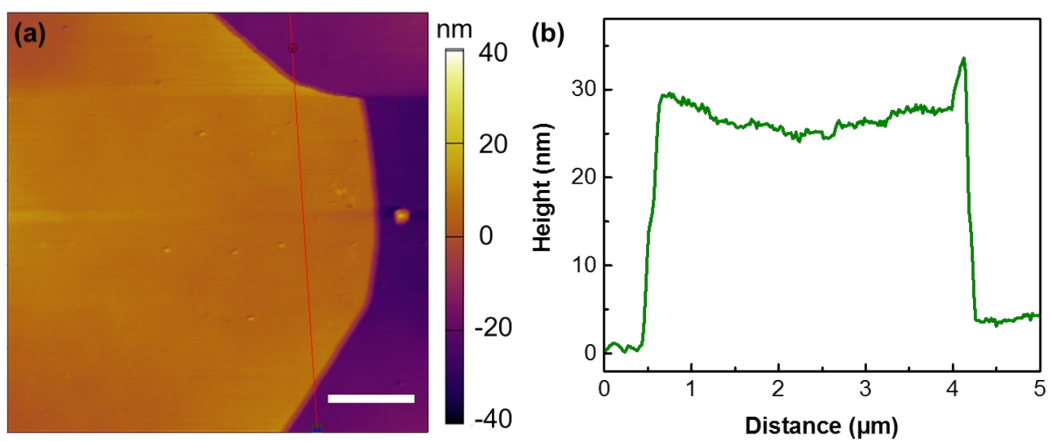

**Fig. S3** (a) AFM image and (b) the height profile of the 2D MoS<sub>2</sub>.

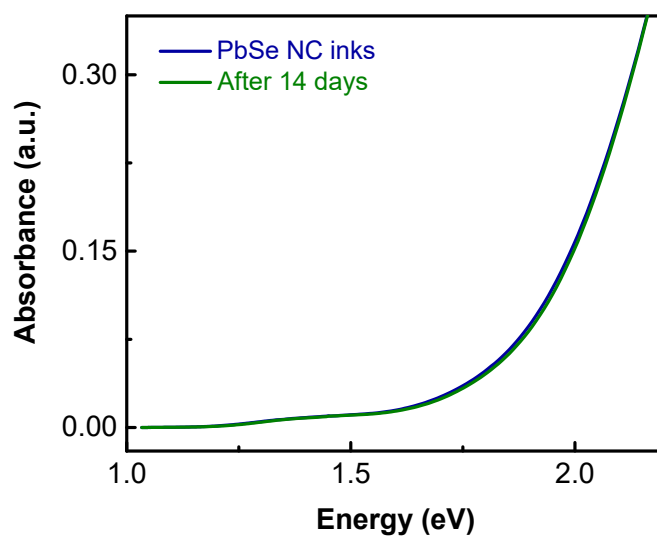

**Fig. S4** Absorbance spectra of the one-step synthesized PbSe NC inks and after 14 days stored in air.

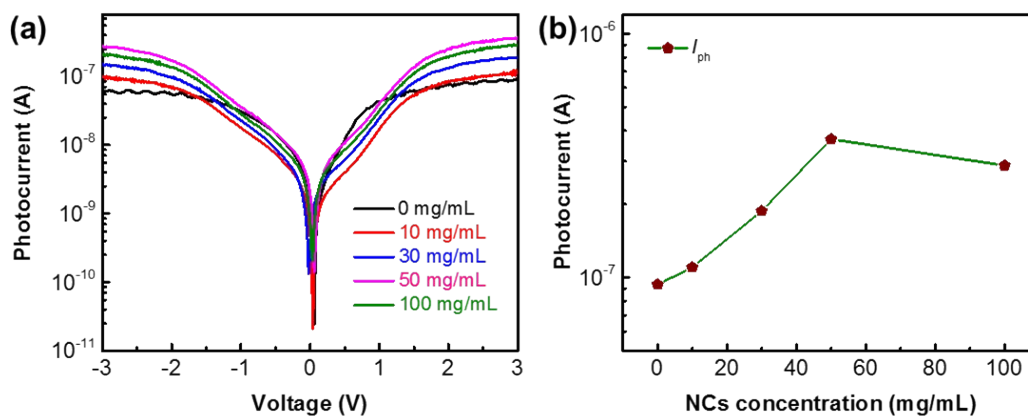

**Fig. S5** The photoresponse performance of PbSe/MoS<sub>2</sub> heterostructure photodetector with different concentration of PbSe NCs solution.

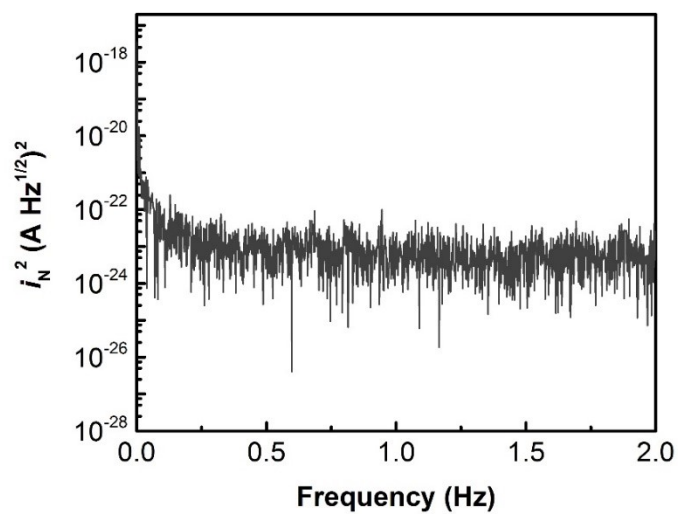

**Fig. S6** Noise power density of the PbSe/MoS<sub>2</sub> heterostructure photodetector.

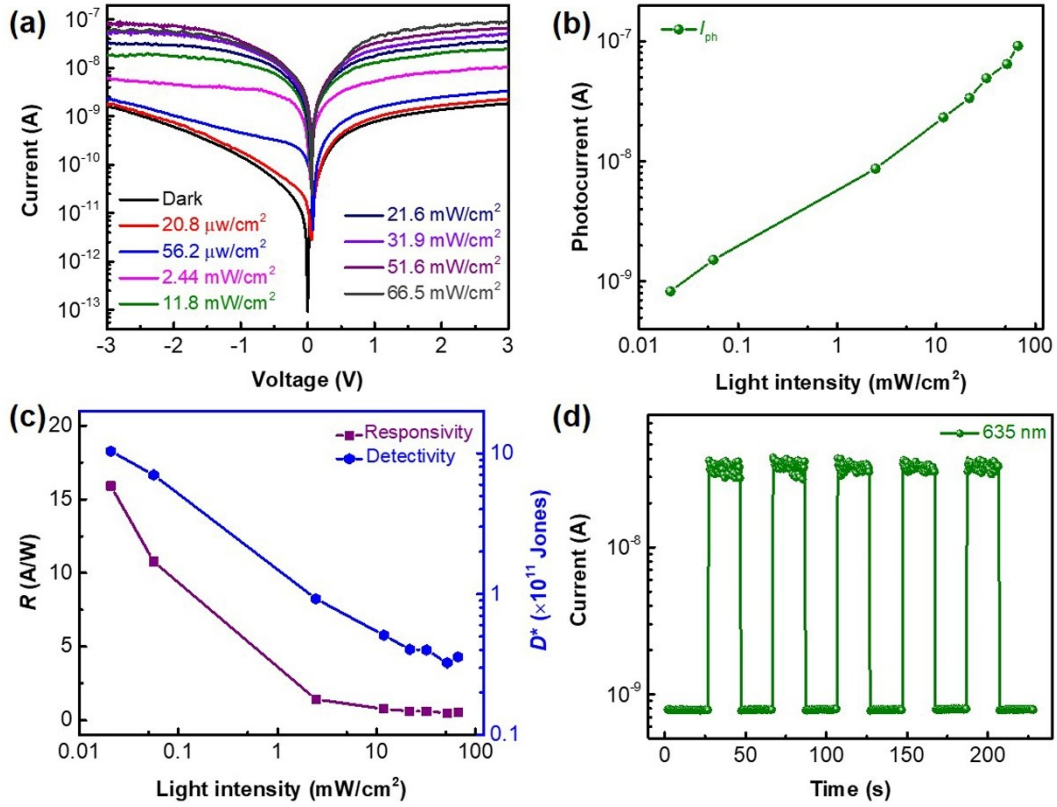

**Fig. S7 Optoelectronic performance of the pristine 2D MoS<sub>2</sub> photodetector under 635 nm light illumination.** (a)  $I$ - $V$  curves of the photodetector with different incident light intensity. (b) The dependence of the photocurrent with the incident light intensity. (c) The calculated  $R$  and  $D^*$  of the photodetector as a function of the incident light intensity. (d)  $I$ -Time curve of the photodetector with the light intensity of  $51.6 \text{ mW}/\text{cm}^2$ .

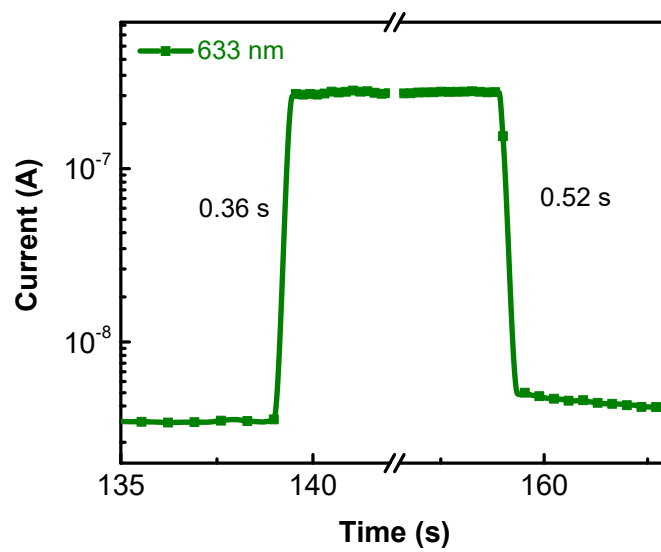

**Fig. S8** Response time of the PbSe/MoS<sub>2</sub> heterostructure photodetector under 635 nm light illumination.

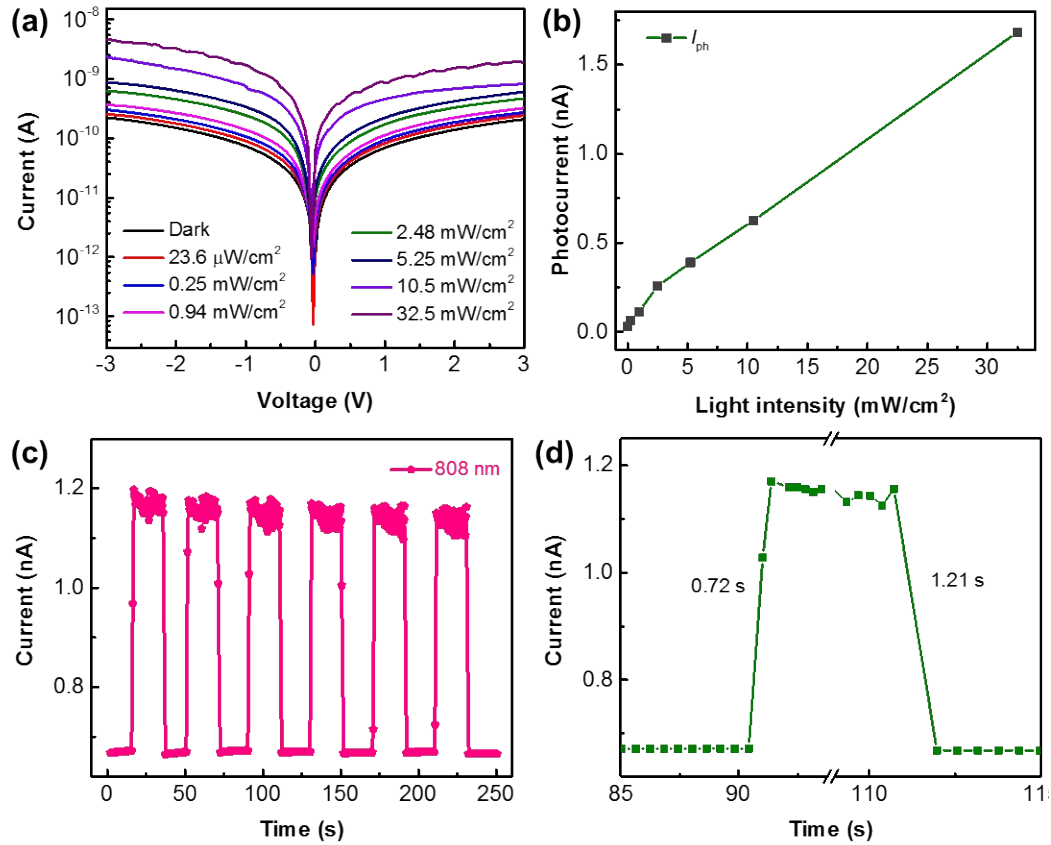

**Fig. S9 Optoelectronic performance of the PbSe photodetector under 808 nm light illumination.** (a) *I-V* curves of the photodetector with different incident light intensity illumination. (b) Relationship between the photocurrent and incident light intensity. (c) *I-Time* curve of the photodetector with the light intensity of  $32.5 \text{ mW}/\text{cm}^2$ . (d) Response time of the pristine PbSe photodetector.

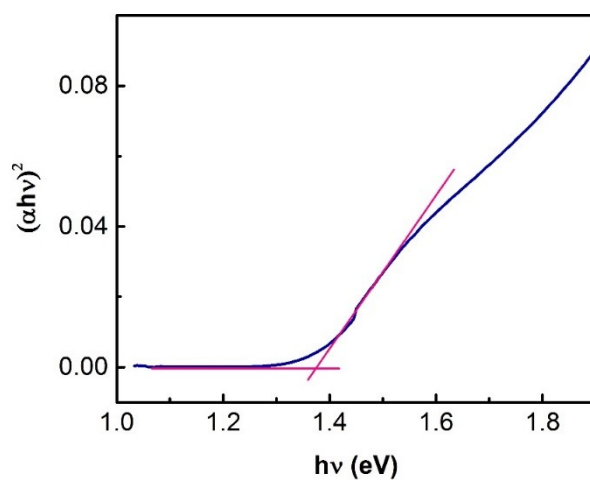

**Fig. S10** Tauc plot of the one-step synthesized PbSe nanocrystal inks.

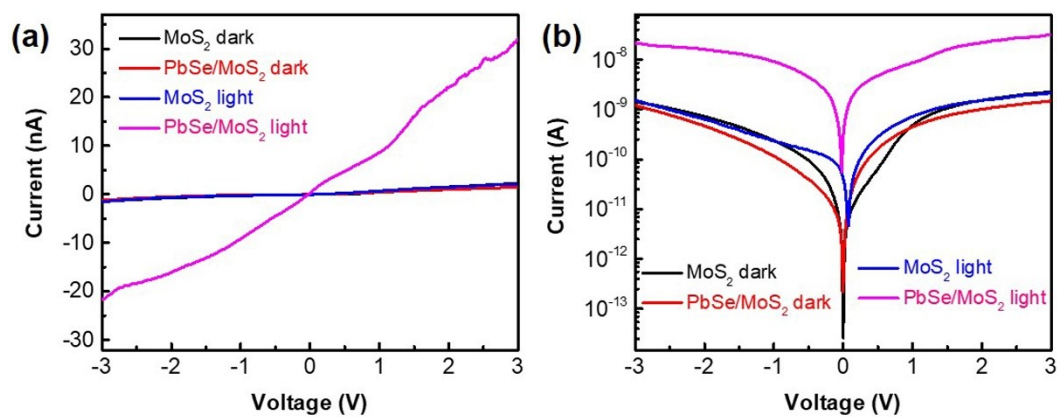

**Fig. S11** (a)  $I$ - $V$  curves and (b) semi-log  $I$ - $V$  curves of the pristine 2D MoS<sub>2</sub> and PbSe/MoS<sub>2</sub> photodetector with 808 nm light illumination and under dark condition.
